# Supplementary material
Source: Springer Nature journal article supplement (http://springerprofessional.de/resource/supplementary/40702_2024_1050_MOESM1_ESM.pdf/26817930)
Supplement: MOESM1 [file 26817930]

## Onlinematerial

Tab. 5 zeigt die Auflistungen der analysierten Artikel des finalen Datensatzes und die genutzten Sprachmodelle oder Interfaces in den genKI-Anwendungsszenarien pro Artikel.

**Tab. 5** Genutzte Sprachmodelle oder Interfaces geordnet nach Artikel

| Autorinnen und Autoren          | Genutztes Sprachmodell oder Interface                                                                                           |
|---------------------------------|---------------------------------------------------------------------------------------------------------------------------------|
| AlAfnan et al. 2023             | ChatGPT                                                                                                                         |
| Alaswad et al. 2023             | ChatGPT; Blender; Bert                                                                                                          |
| Ali und OpenAI 2023             | ChatGPT                                                                                                                         |
| Alkhaqani 2023                  | ChatGPT                                                                                                                         |
| Asfour und Murillo 2023         | GPT-4                                                                                                                           |
| Busch und Hausvik 2023          | ChatGPT                                                                                                                         |
| Campbell 2023                   | ChatGPT                                                                                                                         |
| Cummings et al. 2021            | GPT-2                                                                                                                           |
| DeKay 2023                      | ChatGPT                                                                                                                         |
| dos Santos 2023                 | ChatGPT-3.5; ChatGPT-4; Bing Chat; Bard                                                                                         |
| Fan und Jiang 2023              | ChatGPT                                                                                                                         |
| Feng et al. 2023                | Bloomz; Vicuna; Llama; Llama2; Llama2-chat; Chatglm2; ChatGPT; GPT-4                                                            |
| Frenkel und Emará 2023          | ChatGPT; GPT-4                                                                                                                  |
| Grodzinsky et al. 2023          | ChatGPT-4                                                                                                                       |
| (Guo et al. 2023)               | Midjourney; Huggingface; WenXinYiYan                                                                                            |
| Guttupalli et al. 2023          | ChatGPT                                                                                                                         |
| Hobert et al. 2023              | ChatGPT                                                                                                                         |
| Hu et al. 2023                  | ChatGPT                                                                                                                         |
| Huang und Sciuchetti 2023       | ChatGPT                                                                                                                         |
| Huang et al. 2023               | GPT-3.5; GPT-4; PaLM2                                                                                                           |
| Hutson und Cotroneo 2023        | ChatGPT; DALL-E                                                                                                                 |
| Hutson und Lang 2023            | Craiyon; DALL-E 2; Midjourney                                                                                                   |
| Hutson und Plate 2023a          | EssayAiLab; Essay Soft; Good ai; My Assignment Help; OpenAI; Paper Typer; Study crumb; Article Generator; AI Article Writer 3.0 |
| Hutson und Plate 2023b          | ChatGPT-4                                                                                                                       |
| Hutson und Plate 2023c          | ChatGPT                                                                                                                         |
| Hutson und Schnellmann 2023     | ChatGPT-3                                                                                                                       |
| Iqbal et al. 2023               | ChatGPT                                                                                                                         |
| Juhasz und Guan 2023            | ChatGPT; GPT-4                                                                                                                  |
| Kowalczyk et al. 2023           | Nicht angegeben                                                                                                                 |
| Kumar et al. 2023               | GPT-3; GPT-3.5; GPT-4                                                                                                           |
| Lappalainen und Narayanan 2023  | GPT-3.5                                                                                                                         |
| Leadbetter 2023                 | GPT-3; Davinci-003                                                                                                              |
| M Emmert und Tavanapour 2023    | GPT-3                                                                                                                           |
| Mukherjee und Kamath 2023       | Nicht angegeben                                                                                                                 |
| Panagopoulou et al. 2023        | ChatGPT                                                                                                                         |
| Parker et al. 2023              | GPT-3.5; GPT-4                                                                                                                  |
| Perkins 2023                    | ChatGPT; GPT-2; GPT-3                                                                                                           |
| Ploennigs und Berger 2023       | Midjourney; DALL-E 2; Stable Diffusion                                                                                          |
| Regalia 2023                    | ChatGPT                                                                                                                         |
| Robinson 2023                   | ChatGPT-4                                                                                                                       |
| Sirithumgul 2023                | ChatGPT                                                                                                                         |
| Soman und Ranjani 2023          | Bard; GPT-4; GPT-3.5; Llama                                                                                                     |
| Tang 2023                       | ChatGPT                                                                                                                         |
| Tlili et al. 2023               | ChatGPT                                                                                                                         |
| Torres 2023                     | ChatGPT; Bard                                                                                                                   |
| Tsai et al. 2023                | ChatGPT; GPT-4                                                                                                                  |
| Vasconcelos und dos Santos 2023 | ChatGPT                                                                                                                         |
| Wang et al. 2023                | ChatGPT; GPT-4                                                                                                                  |
| Weingart et al. 2023            | GPT-3                                                                                                                           |
| Yun et al. 2022                 | GPT-2                                                                                                                           |
| Zeng 2023                       | ChatGPT                                                                                                                         |

## Literaturverzeichnis

- AlAfnan MA, Dishari S, Jovic M, Lomidze K (2023) ChatGPT as an Educational Tool: Opportunities, Challenges, and Recommendations for Communication, Business Writing, and Composition Courses. *Journal of Artificial Intelligence and Technology* 3(2):60–68. <https://doi.org/10.37965/jait.2023.0184>
- Alaswad S, Kalganova T, Awad WS (2023) Using ChatGPT and other LLMs in Professional Environments. *Information Sciences Letters* 12(9):2097–2108. <https://doi.org/10.18576/isl/120916>
- Ali F, OpenAI (2023) Let the devil speak for itself: Should ChatGPT be allowed or banned in hospitality and tourism schools? *Journal of Global Hospitality and Tourism* 2(1):1–6. <https://doi.org/10.5038/2771-5957.2.1.1016>
- Alkhaqani AL (2023) Potential Benefits and Challenges of ChatGPT in Future Nursing Education. *Maaen Journal for Medical Sciences* 2(2):49–53. <https://doi.org/10.55810/2789-9128.1020>
- Asfour M, Murillo J (2023) Harnessing Large Language Models to Simulate Realistic Human Responses to Social Engineering Attacks: A Case Study. *International Journal of Cybersecurity Intelligence & Cybercrime* 6(2):21–49
- Busch PA, Hausvik GI (2023) Too Good to Be True? An Empirical Study of ChatGPT Capabilities for Academic Writing and Implications for Academic Misconduct. In: *Proceedings of the Americas Conference on Information Systems (AMCIS2023)*
- Campbell P (2023) Using ChatGPT in your Teaching. <https://digitalcommons.salve.edu/aipp/1>. Zugegriffen: 5. November 2023
- Cummings P, Mullins R, Moquete M, Schurr N (2021) Hello World! I am Charlie, an Artificially Intelligent Conference Panelist. In: *Proceedings of the Hawaii International Conference on System Sciences (HICSS2021)*, S. 380–389
- DeKay C (2023) “Source?” “I Made It Up”: The Ethics of Citing ChatGPT in Academia. *Final Projects Summer 2023*
- dos Santos RP (2023) Enhancing Physics Learning with ChatGPT, Bing Chat, and Bard as Agentsto-Think-With: A Comparative Case Study. *arXiv*. <https://doi.org/10.48550/arXiv.2306.00724>
- Fan Y, Jiang F (2023) Uncovering the Potential of ChatGPT for Discourse Analysis in Dialogue: An Empirical Study. *arXiv*. <https://doi.org/10.48550/arXiv.2305.08391>
- Feng D, Dai Y, Huang J, Zhang Y, Xie Q, Han W et al. (2023) Empowering Many, Biasing a Few: Generalist Credit Scoring through Large Language Models. *arXiv*. <https://doi.org/10.48550/arXiv.2310.00566>
- Frenkel ME, Emara H (2023) ChatGPT & Mechanical Engineering: Examining performance on the FE Mechanical Engineering and Undergraduate Exams. *arXiv*. <https://doi.org/10.48550/arXiv.2309.15866>
- Grodzinsky F, Miller K, Wolf M (2023) When AI Moves Downstream, Sacred Heart University
- Guo X, Xiao Y, Wang J, Ji T (2023) Rethinking designer agency: A case study of co-creation between designers and AI. In: (D., Galluzzo, L., Rizzo, F., Spallazzo, D.) (Hrsg.). *International Association of Societies of Design Research*. <https://doi.org/10.21606/iasdr.2023.478>
- Guttupalli S, Maloy RW, Edwards S (2023) Comparing Teacher-Written and AI-Generated Math Problem Solving Strategies for Elementary School Students: Implications for Classroom Learning. *University of Massachusetts Amherst*. <https://doi.org/10.7275/8sgx-xj08>
- Hobert S, Groth M, Nießner T, Wilhelmi L (2023) How Today’s AI Content Generators Outperform Average Novice Students in Information Systems Exams. In: *Proceedings of the Americas Conference on Information Systems (AMCIS2023)*
- Hu X, Tian Y, Nagato K, Nakao M, Liu A (2023) Opportunities and challenges of ChatGPT for design knowledge management. *Procedia CIRP* 119:21–28. <https://doi.org/10.1016/j.procir.2023.05.001>
- Huang J, Sciuchetti M (2023) ChatGPT Unveiled: Unleashing AI Magic in Online Shopping and Digital Marketing. *Atlantic Marketing Journal* 12(2):1–7
- Huang K-H, Laban P, Fabbri AR, Choubey PK, Joty S, Xiong C et al. (2023) Embrace Divergence for Richer Insights: A Multi-document Summarization Benchmark and a Case Study on Summarizing Diverse Information from News Articles. *arXiv*. <https://doi.org/10.48550/arXiv.2309.09369>

- Hutson J, Cotroneo P (2023) Generative AI tools in art education: Exploring prompt engineering and iterative processes for enhanced creativity. *Metaverse* 4(1):15–28. <https://doi.org/10.54517/m.v4i1.2164>
- Hutson J, Lang M (2023) Content creation or interpolation: AI generative digital art in the classroom. *Metaverse* 4(1):2–14. <https://doi.org/10.54517/m.v4i1.2158>
- Hutson J, Plate D (2023a) Enhancing Institutional Assessment and Reporting Through Conversational Technologies: Exploring the Potential of AI-Powered Tools and Natural Language Processing. *Journal of Artificial Intelligence and Robotics* 1(1):11–22
- Hutson J, Plate D (2023b) Human-AI Collaboration for Smart Education: Reframing Applied Learning to Support Metacognition. Lindenwood University
- Hutson J, Plate D (2023c) Working With (Not Against) the Technology: GPT3 and Artificial Intelligence (AI) in College Composition. *Journal of Robotics and Automation Research* 4(1):330–337
- Hutson J, Schnellmann A (2023) The Poetry of Prompts: The Collaborative Role of Generative Artificial Intelligence in the Creation of Poetry and the Anxiety of Machine Influence. *Global Journal of Computer Science and Technology: D* 23(1):1–14
- Iqbal F, Samsom F, Kamoun F, MacDermott Á (2023) When ChatGPT goes rogue: exploring the potential cybersecurity threats of AI-powered conversational chatbots. *Frontiers in Communications and Networks* 4. <https://doi.org/10.3389/frcmn.2023.1220243>
- Juhasz L, Guan B (2023) Utilizing Large Language Models in geographic contexts - Experiences from the FIU GIS Center. <https://digitalcommons.fiu.edu/cgi/viewcontent.cgi?article=1104&context=gis>
- Kowalczyk P, Röder M, Thiesse F (2023) Nudging Creativity in Digital Marketing with Generative Artificial Intelligence: Opportunities and Limitations. In: *Proceedings of the European Conference on Information Systems (ECIS2023)*
- Kumar D, AbuHashem Y, Durumeric Z (2023) Watch Your Language: Large Language Models and Content Moderation. *arXiv*. <https://doi.org/10.48550/arXiv.2309.14517>
- Lappalainen Y, Narayanan N (2023) Aisha: A Custom AI Library Chatbot Using the ChatGPT API. *Journal of Web Librarianship* 17(3):37–58. <https://doi.org/10.1080/19322909.2023.2221477>
- Leadbetter L (2023) Maximizing Productivity and Quality in Senior Thesis Writing with Artificial Intelligence and Natural Language Processing Driven Tools, Claremont McKenna College
- Memmert L, Tavanapour N (2023) Towards Human-AI-Collaboration in Brainstorming: Empirical Insights into the Perception of Working with a Generative AI. In: *Proceedings of the European Conference on Information Systems (ECIS2023)*
- Mukherjee A, Kamath NP (2023) Intelligent Auto-Learning Generative Knowledge Finder for Proactively Aiding a Virtual Agent. *Defensive Publications Series*
- Panagopoulou F, Parpoula C, Karpouzis K (2023) Legal and ethical considerations regarding the use of ChatGPT in education. *arXiv*. <https://doi.org/10.48550/arXiv.2306.10037>
- Parker MJ, Anderson C, Stone C, Oh Y (2023) A Large Language Model Approach to Educational Survey Feedback Analysis. *arXiv*. <https://doi.org/10.48550/arXiv.2309.17447>
- Perkins M (2023) Academic integrity considerations of AI Large Language Models in the post-pandemic era: ChatGPT and beyond. *Journal of University Teaching and Learning Practice* 20(2). <https://doi.org/10.53761/1.20.02.07>
- Ploennigs J, Berger M (2023) AI art in architecture. *AI in Civil Engineering* 2(1). <https://doi.org/10.1007/s43503-023-00018-y>
- Regalia J (2023) The Case for Iterative Legal Writing Practice with ChatGPT. [https://scholarship.law.wm.edu/incorporating\\_chatgpt/schedule/fullschedule/2](https://scholarship.law.wm.edu/incorporating_chatgpt/schedule/fullschedule/2). Zugegriffen: 5. November 2023
- Robinson D (2023) Evaluating the Potential of AI in Sports Consulting: Investigating ChatGPT- 4's Ability to Consult an MLB Team, Kenyon College
- Sirithumgul P (2023) Unlocking the Potential of ChatGPT: A Grounded Theory Exploration of its Impact on the Business Landscape. In: *Proceedings of the Americas Conference on Information Systems (AMCIS2023)*
- Soman S, Ranjani HG (2023) Observations on LLMs for Telecom Domain: Capabilities and Limitations. *arXiv*. <https://doi.org/10.48550/arXiv.2305.13102>
- Tang Y (2023) Understanding Societal Values of ChatGPT. Master thesis, Washington University. St. Louis, Missouri. <https://doi.org/10.7936/sbad-jm91>

- Tlili A, Shehata B, Adarkwah MA, Bozkurt A, Hickey DT, Huang R et al. (2023) What if the devil is my guardian angel: ChatGPT as a case study of using chatbots in education. *Smart Learning Environments* 10(15). <https://doi.org/10.1186/s40561-023-00237-x>
- Torres JM (2023) Leveraging AI platforms for Business Librarians and Information Professionals: Developing Pedagogical Strategies to Disseminate Information and Improve Learning Retention., Rutgers University. <https://docs.lib.purdue.edu/cgi/viewcontent.cgi?article=1042&context=mbls>. Zugegriffen: 5. November 2023
- Tsai C-H, Kadire S, Sreeramdas T, VanOrmer M, Thoene M, Hanson C et al. (2023) Generating Personalized Pregnancy Nutrition Recommendations with GPT-Powered AI Chatbot. In: *Proceedings of the International Conference on Information Systems for Crisis Response and Management*, S. 263–271
- Vasconcelos MAR, dos Santos RP (2023) Enhancing STEM learning with ChatGPT and Bing Chat as objects to think with: A case study. *Eurasia Journal of Mathematics, Science and Technology Education* 19(7). <https://doi.org/10.29333/ejmste/13313>
- Wang Z, Zhang L, Cao C, Liu P (2023) The Effectiveness of Large Language Models (ChatGPT and CodeBERT) for Security-Oriented Code Analysis. *arXiv*. <https://doi.org/10.48550/arXiv.2307.12488>
- Weingart P, Wambsganss T, Soellner M (2023) A taxonomy for deriving business insights from user-generated content. In: *Proceedings of the European Conference on Information Systems (ECIS2023)*
- Yun G, Cho K, Jeong Y, Nam T-J (2022) Ideasquares: Utilizing generative text as a source of design inspiration. In: *Proceedings of the Conference of Design Research Society (DRS2022)*. <https://doi.org/10.21606/drs.2022.484>
- Zeng F (2023) Evaluating the Problem Solving Abilities of ChatGPT. Master thesis, Washington University. St. Louis, Missouri. <https://doi.org/10.7936/7vz0-dr08>
